# Supplementary material for: Right on track? Performance of satellite telemetry in terrestrial wildlife research
Source: PubMed Central journal article supplement (PMC6508664; doi:10.1371/journal.pone.0216223), 2019-05-09
Supplement: pone.0216223.s006.pdf [file pone.0216223.s006.pdf]

**S2 Fig. Distribution of response variables and covariates.** We refer to the Materials and Methods section of the main text for more information regarding the response variables and the covariates (see also Table 1).

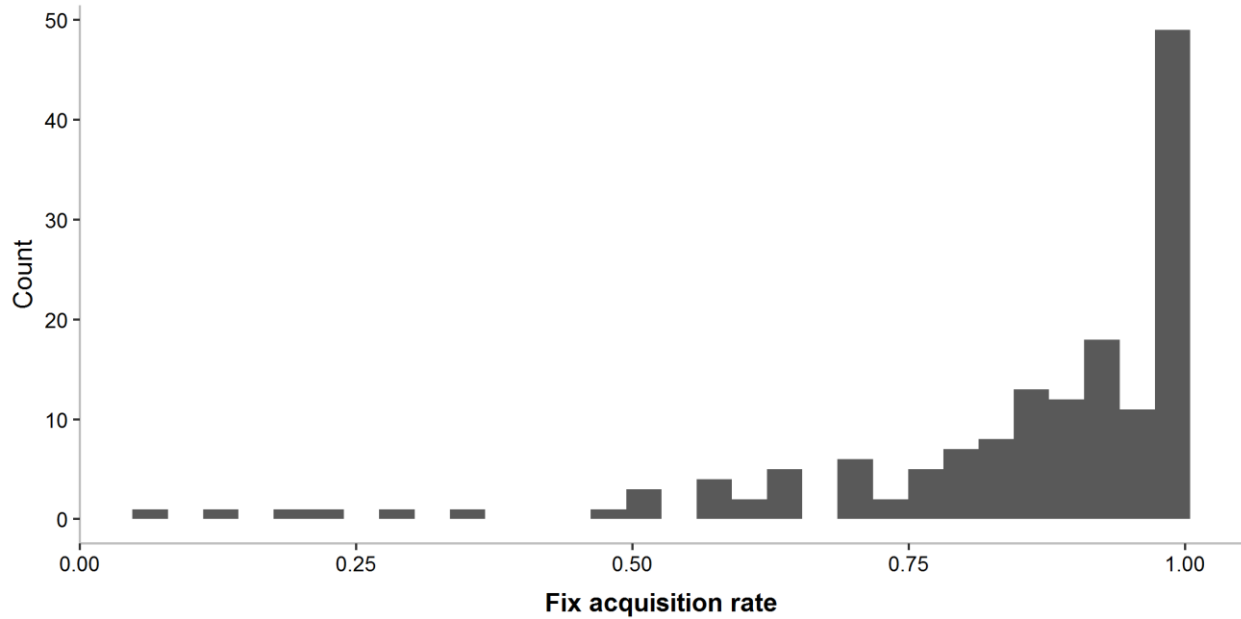

**Fig S2.1. Distribution of the Fix acquisition rate**

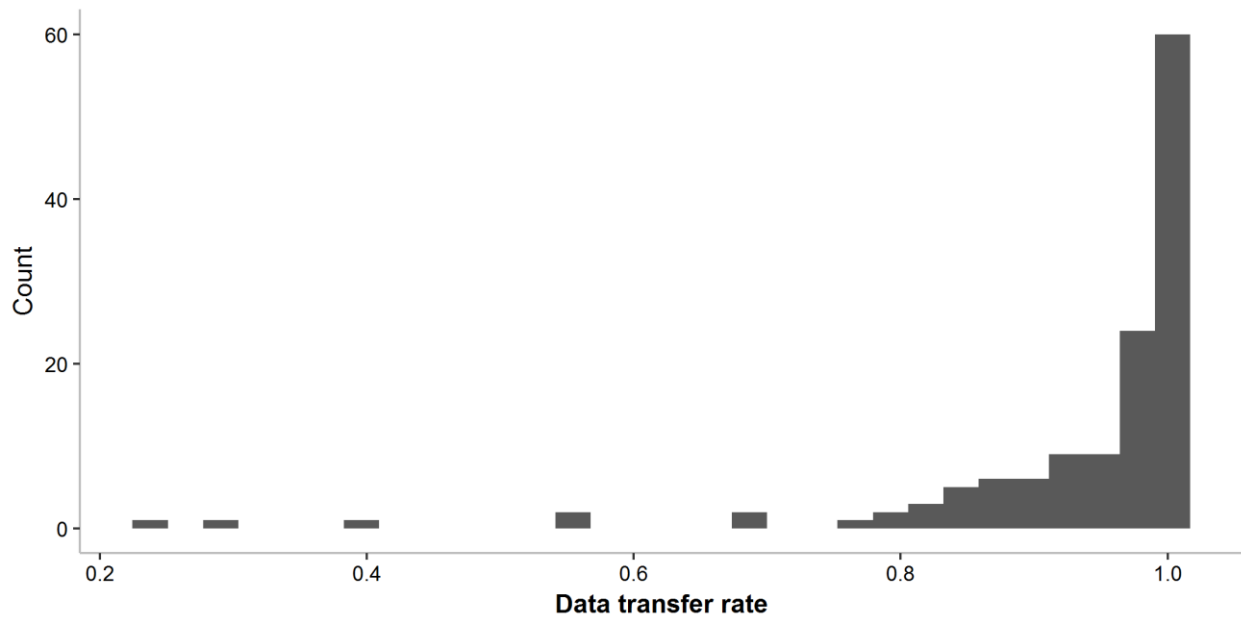

**Fig S2.2. Distribution of the Data transfer rate**

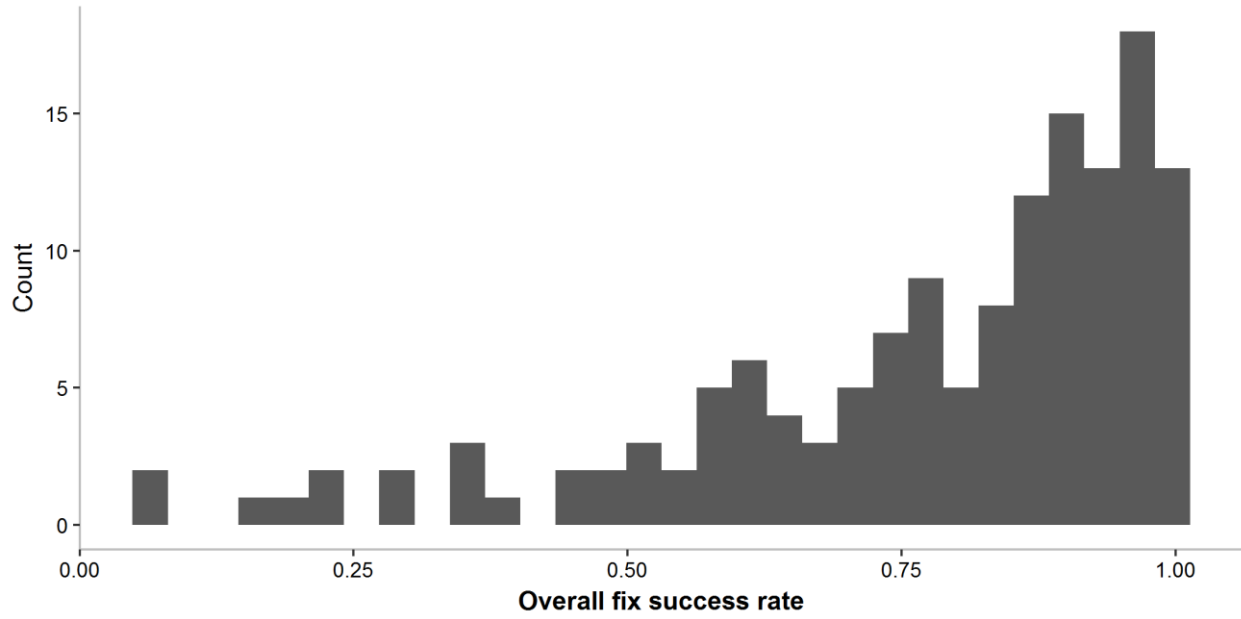

**Fig S2.3. Distribution of the Overall fix success rate**

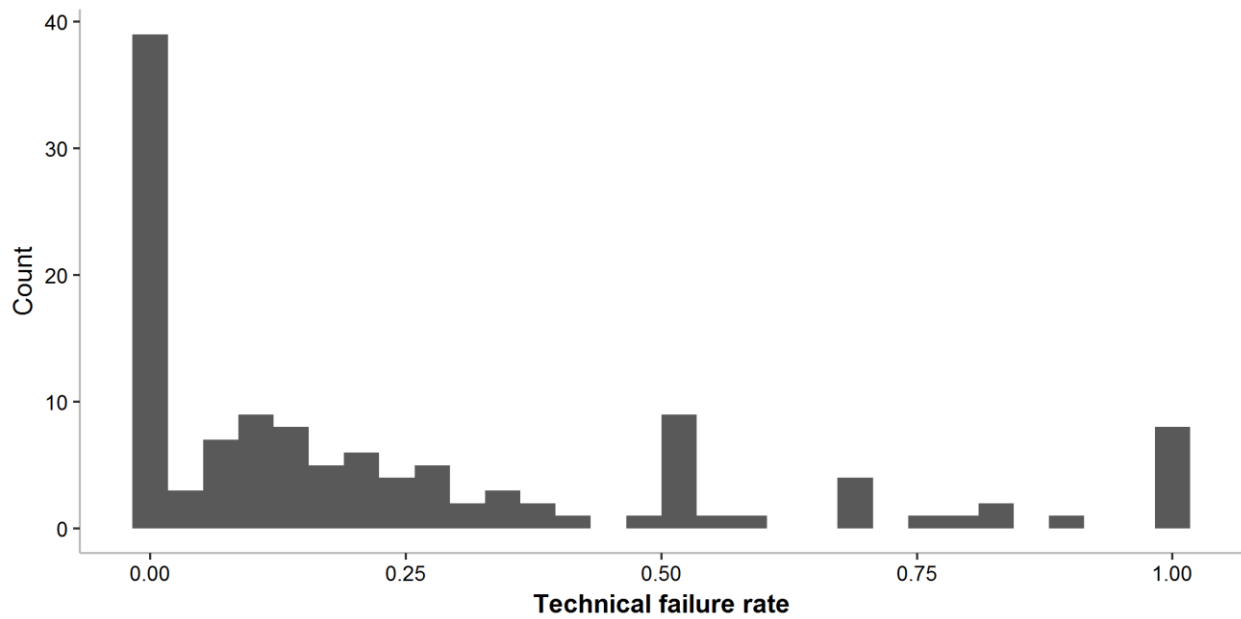

**Fig S2.4. Distribution of the Technical failure rate**

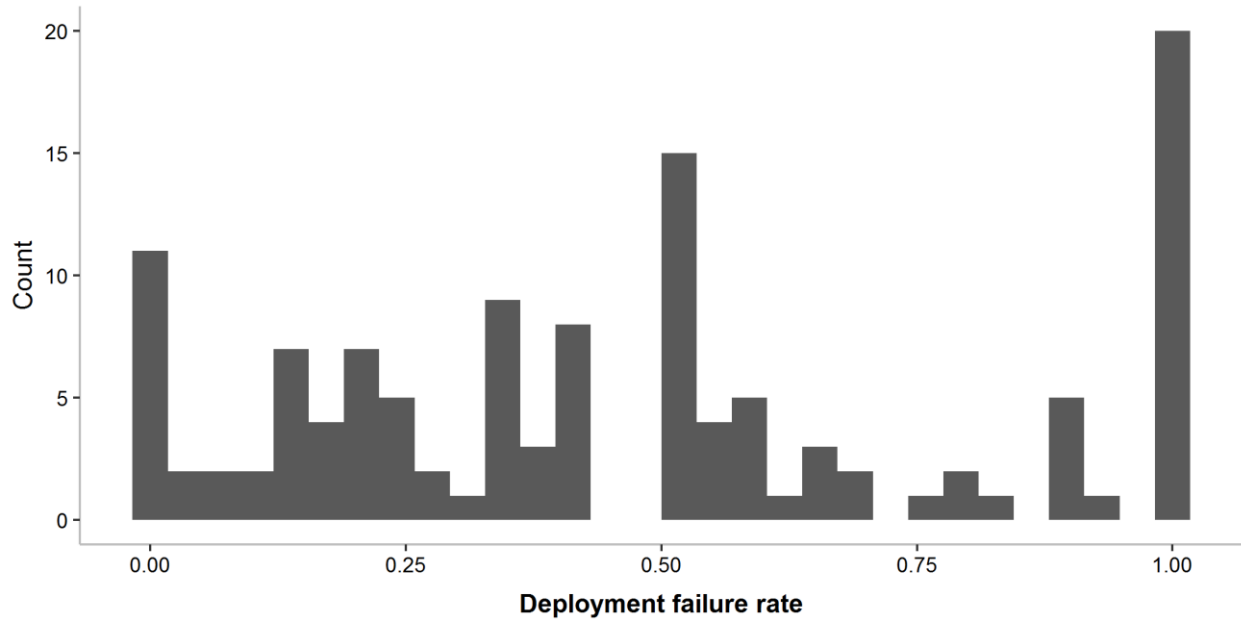

**Fig S2.5. Distribution of the Deployment failure rate**

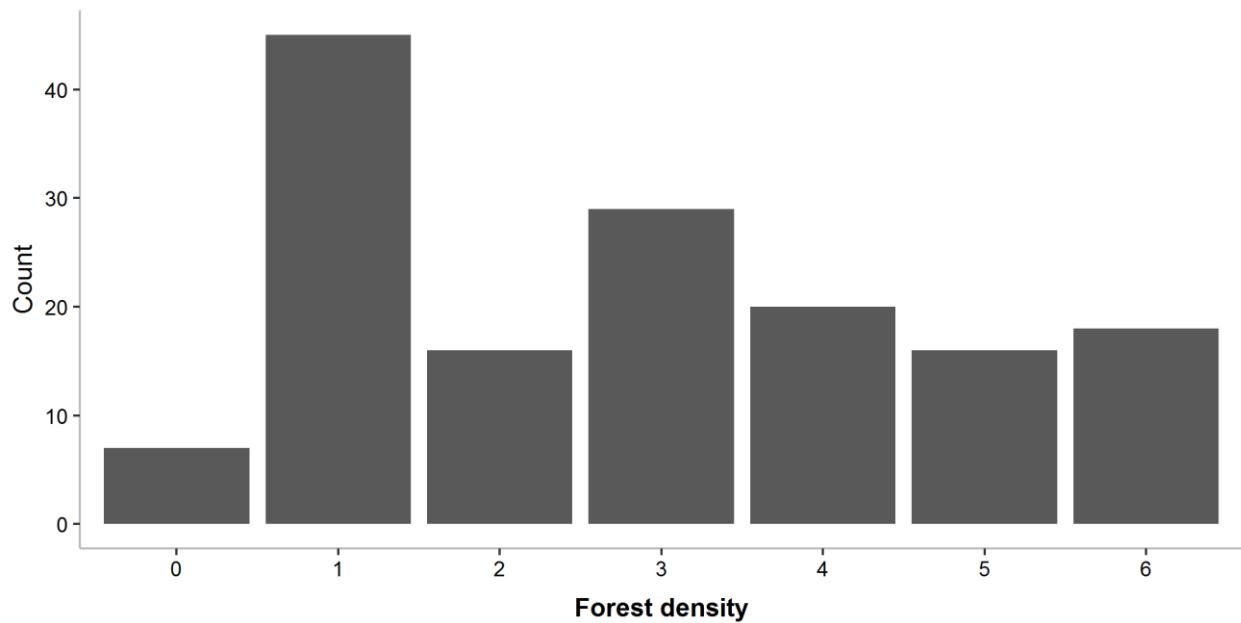

**Fig S2.6. Distribution of Forest density.** Levels: 0 = No forest cover; 1 = Open understory & sparse canopy cover; 2 = Dense understory & sparse canopy cover; 3 = Open understory & intermediate canopy cover; 4 = Dense understory & inter-mediate canopy cover, 5 = Open understory & closed canopy; 6 = Dense understory & closed canopy.

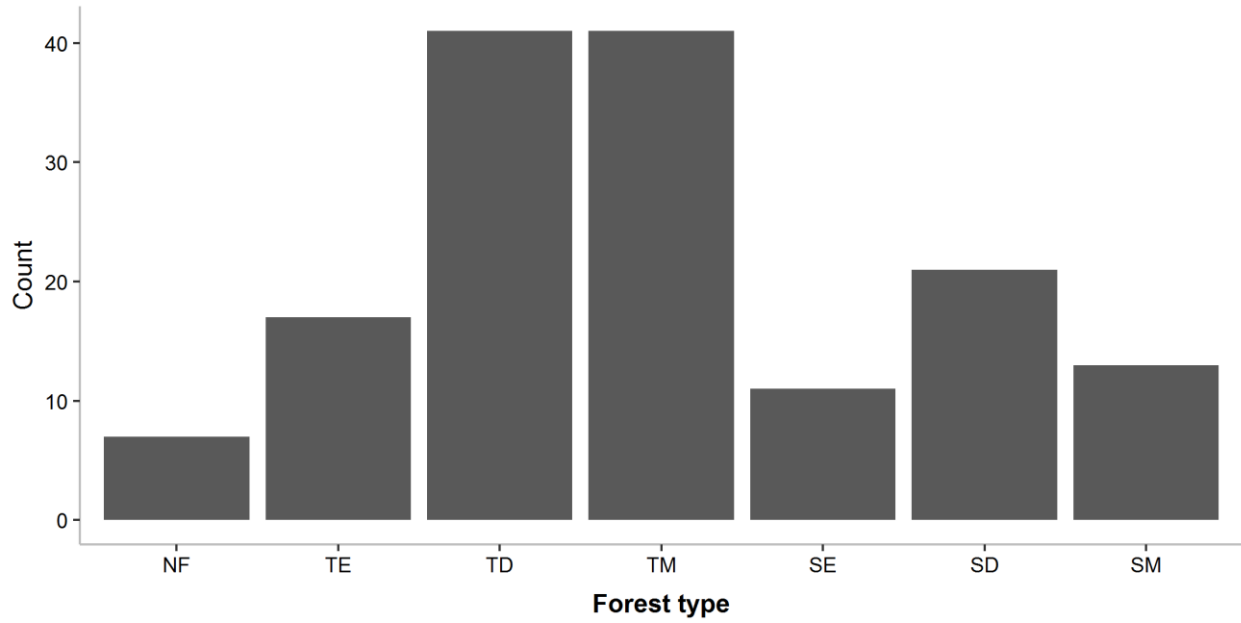

**Fig S2.7. Distribution of Forest type.** Levels: No forest cover; Temperate evergreen; Temperate deciduous; Temperate mixed; (Sub)Tropical evergreen; (Sub)Tropical deciduous; (Sub)Tropical mixed.

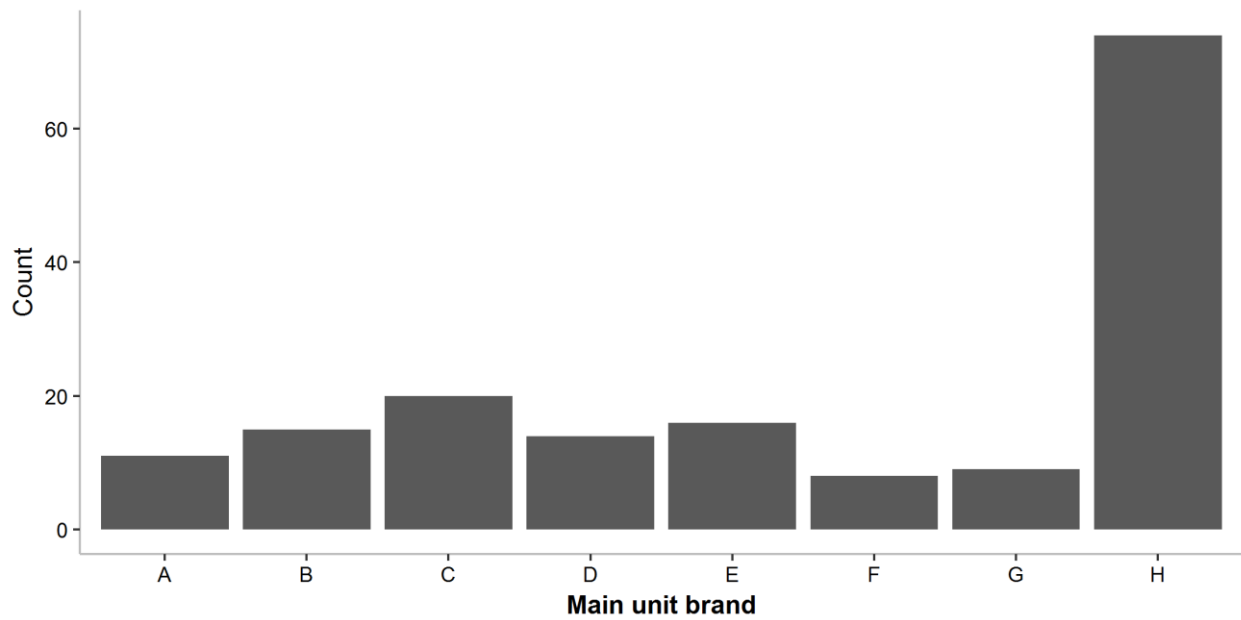

**Fig S2.8. Distribution of Main unit brand.**

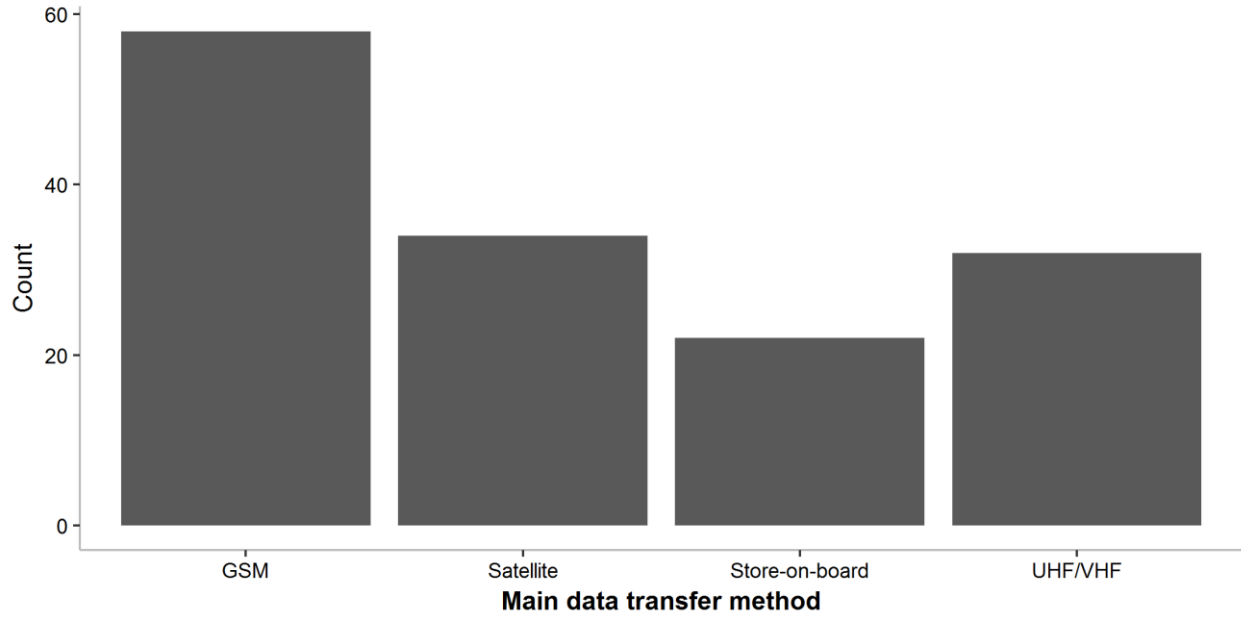

**Fig S2.9. Distribution of Data transfer method**

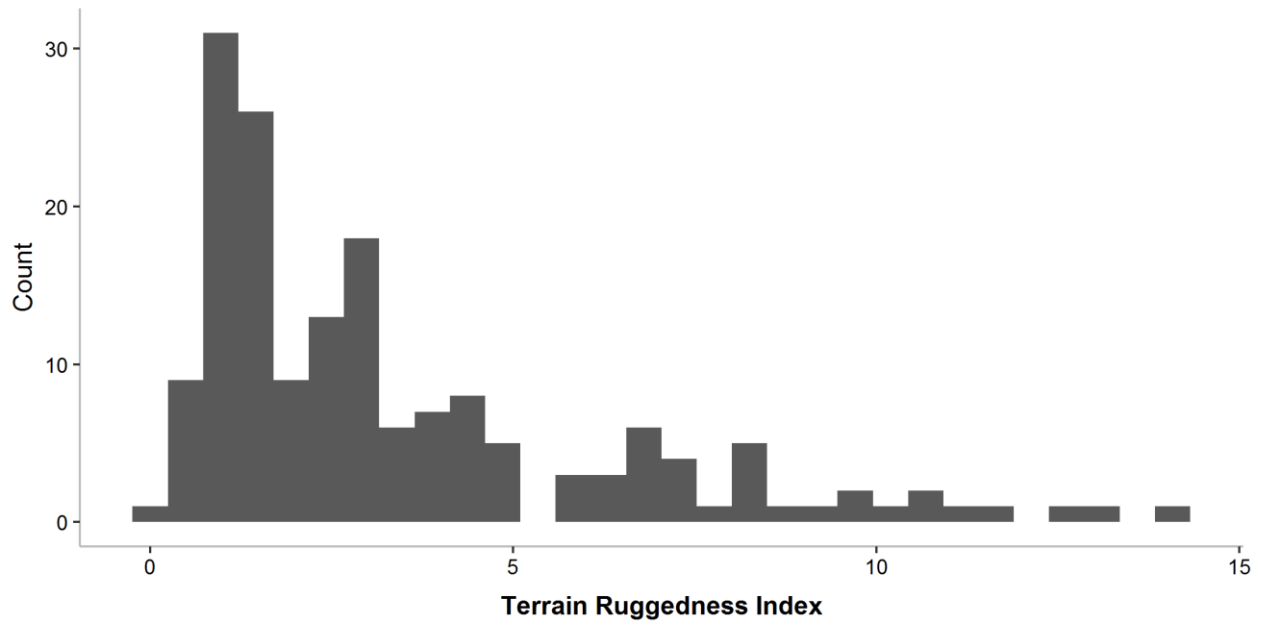

**Fig S2.10. Distribution of Terrain Ruggedness Index**

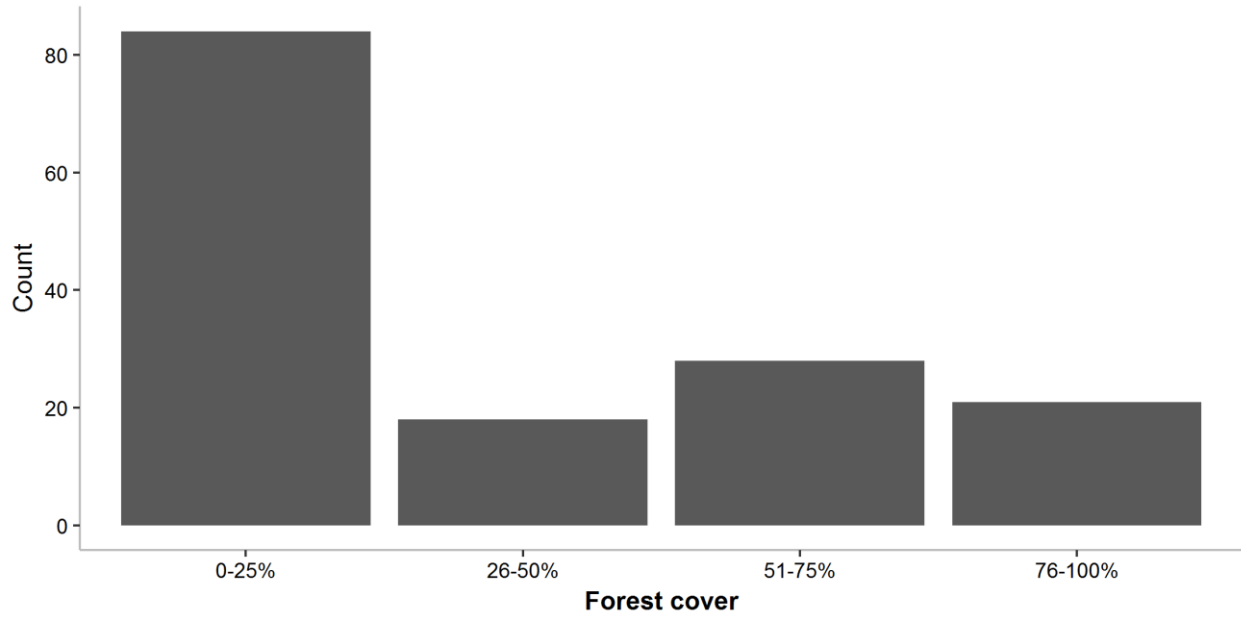

**Fig S2.11. Distribution of Forest cover (qualitative).**

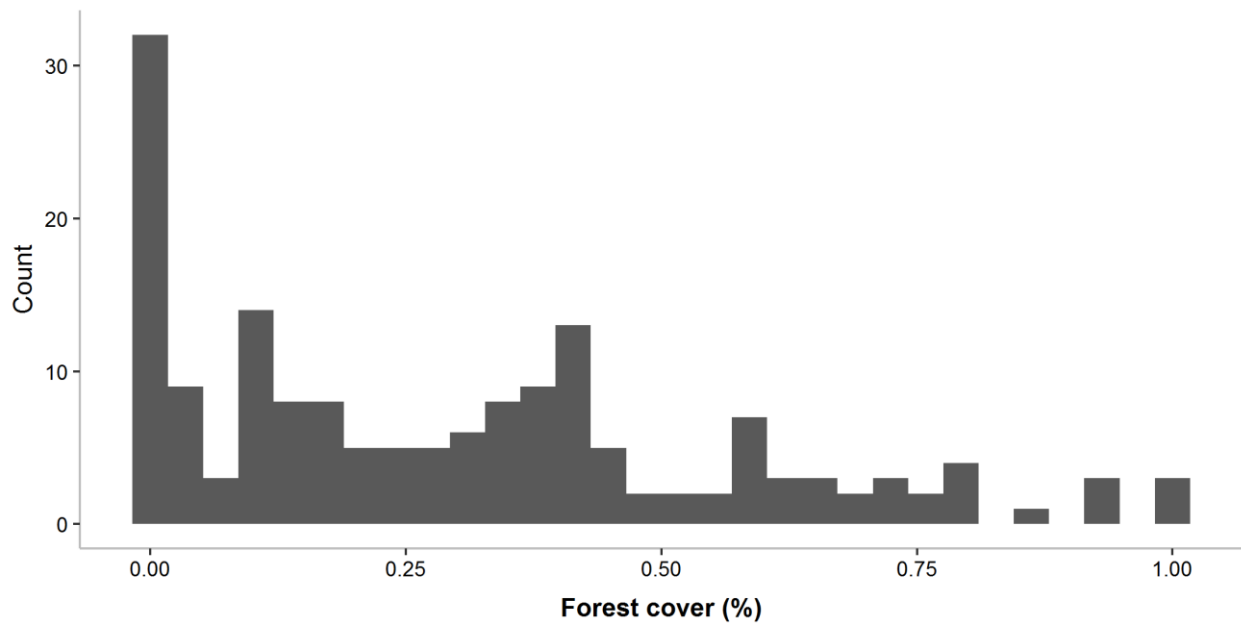

**Fig S2.12. Distribution of Forest cover (quantitative)**

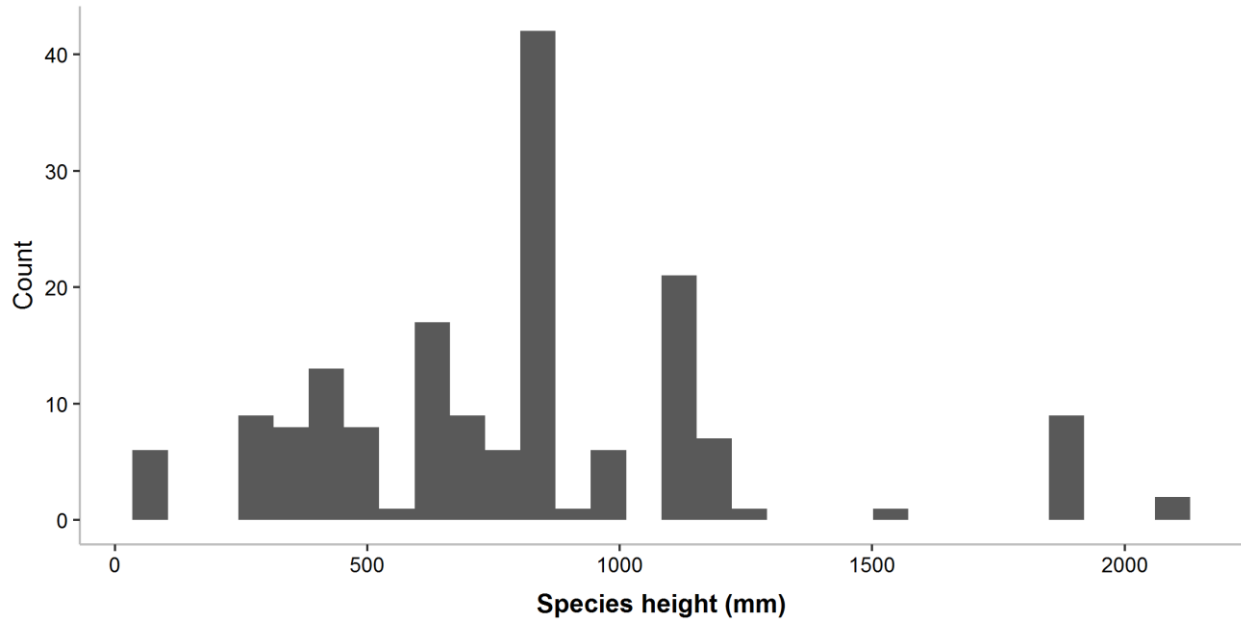

**Fig S2.13. Distribution of Species height.**

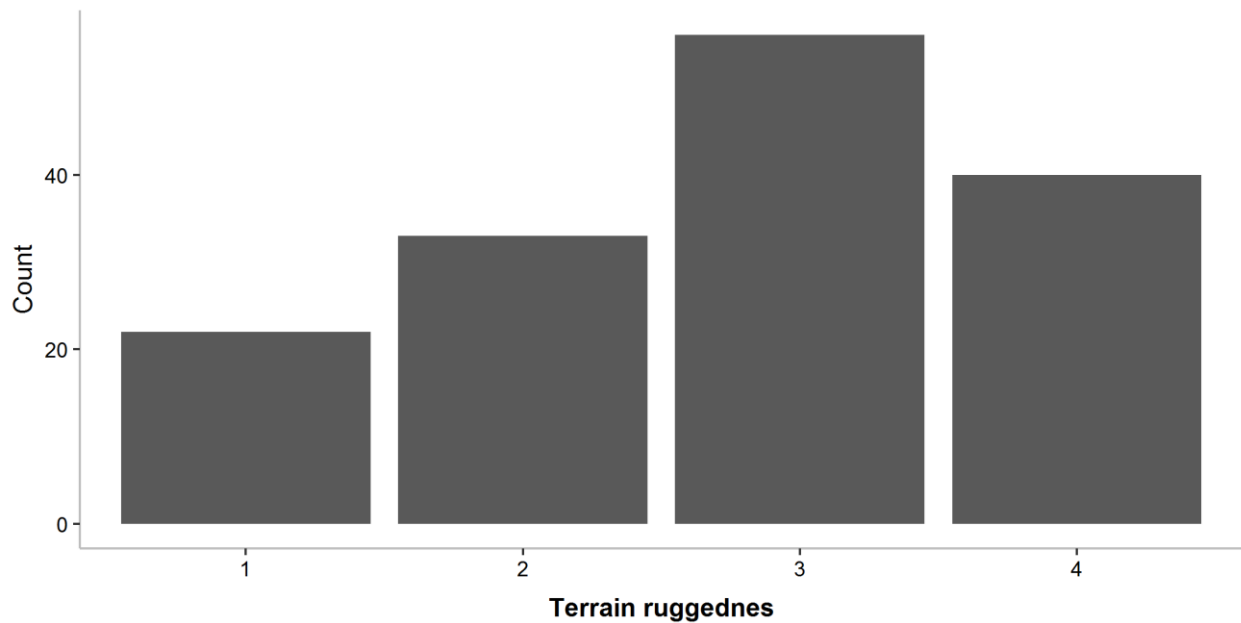

**Fig S2.14. Distribution of Terrain ruggedness.** Levels: Steep slopes and narrow valleys, flat areas and gentle slopes are rare (< 20%); Steep slopes, interspersed with flat areas and/or gentle slopes; Mostly flat area and/or gentle slopes, with occasional steep slopes (< 20%); Mostly flat area or gentle slopes (< 5% steep slopes).

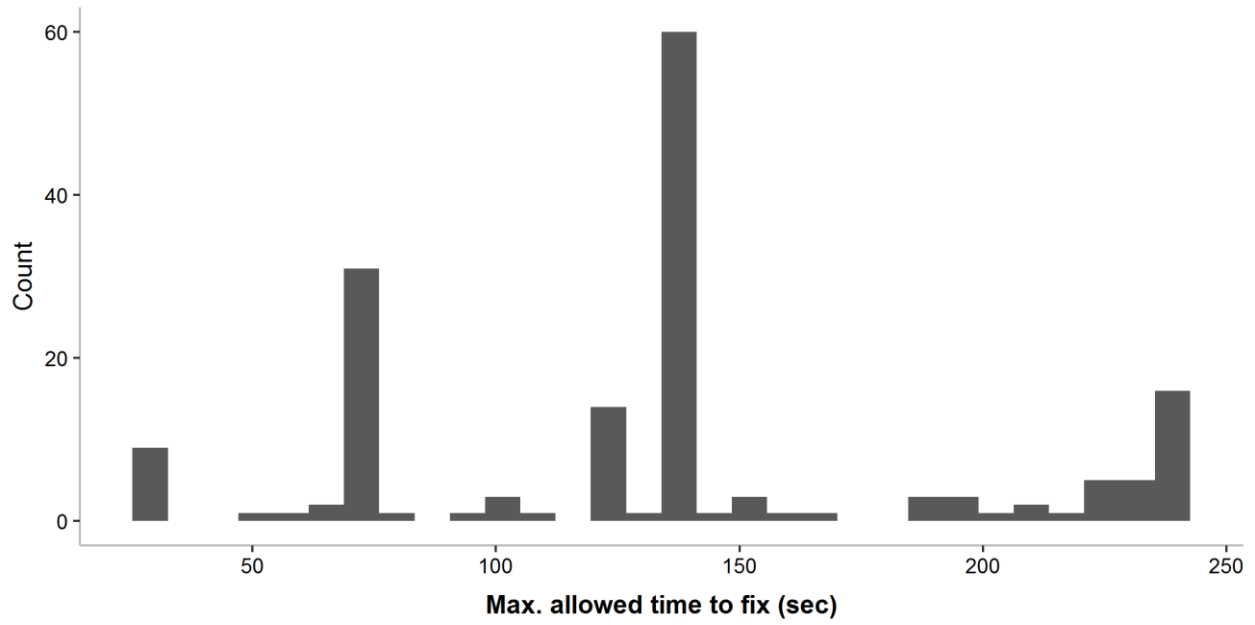

**Fig S2.15. Distribution of Maximum allowed time to fix (sec).**

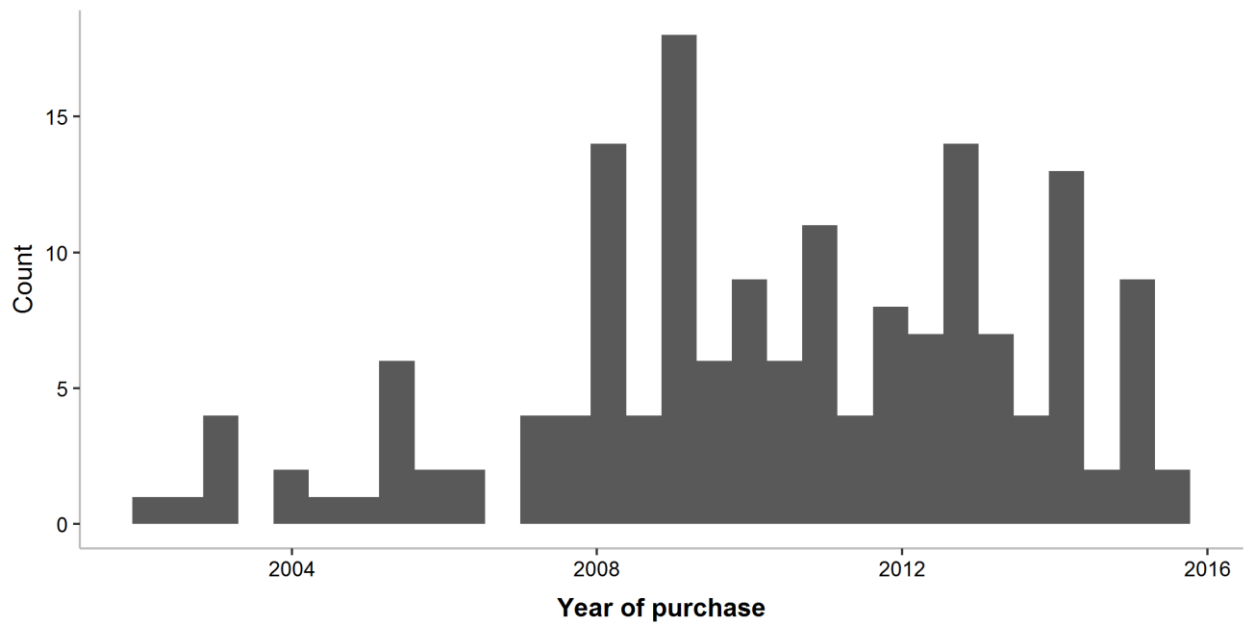

**Fig S2.16. Distribution of Year of purchase.**
