# Supplementary material for: Right on track? Performance of satellite telemetry in terrestrial wildlife research
Source: PubMed Central journal article supplement (PMC6508664; doi:10.1371/journal.pone.0216223), 2019-05-09

**S3 Fig. Covariate partial effects on the variability of the Fix acquisition rate.** Mean-centered partial effects of the most important variables predicting the variability ( $\phi$ ) of the fix acquisition rate of satellite telemetry units (empirical confidence intervals in grey). Graphs are presented left-to-right in order of importance. Partial effects display the effect of the variable while accounting for all other variables in the model.

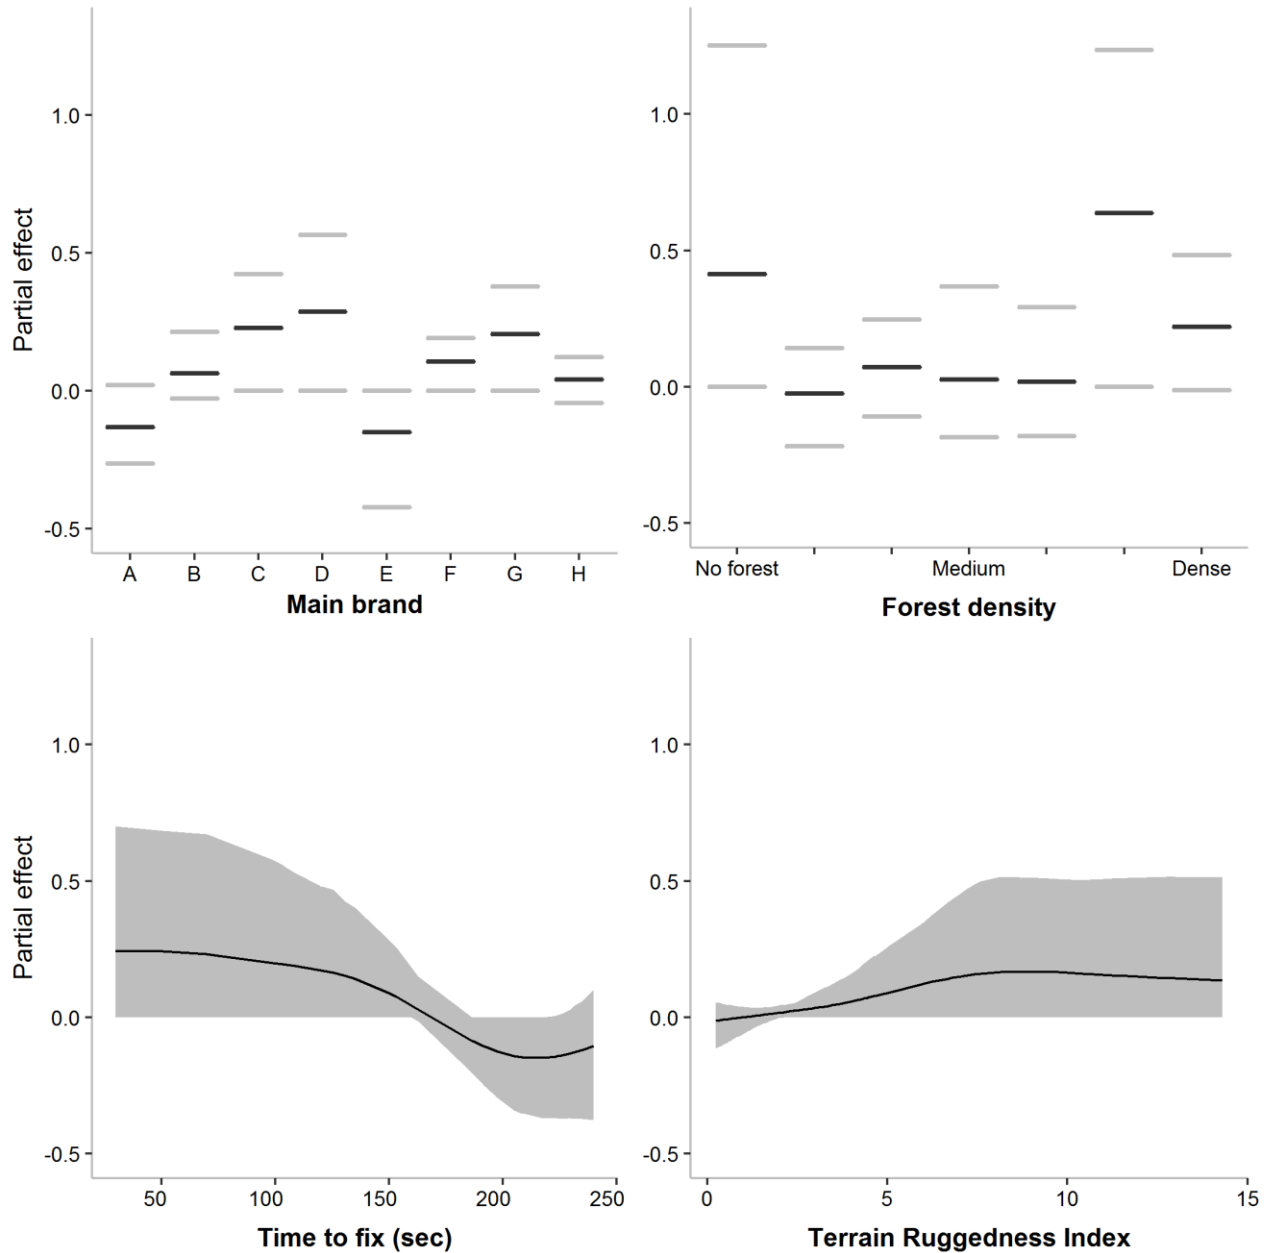

Supplement: pone.0216223.s007.pdf [file pone.0216223.s007.pdf]
