# Supplementary material for: Right on track? Performance of satellite telemetry in terrestrial wildlife research
Source: PubMed Central journal article supplement (PMC6508664; doi:10.1371/journal.pone.0216223), 2019-05-09

**S4 Fig. Covariate partial effects on the variability of the Overall fix success rate.**

Mean-centered partial effects of the most important variables predicting the variability ( $\phi$ ) of the overall fix success rate of satellite telemetry units (empirical confidence intervals in grey).

Graphs are presented left-to-right in order of importance. Partial effects display the effect of the variable while accounting for all other variables in the model. Forest types are: No Forest (NF), Temperate Evergreen (TE), Temperate Deciduous (TD), Temperate Mixed (TM), (Sub)Tropical Evergreen (SE), (Sub)Tropical Deciduous (SD), and (Sub)Tropical Mixed (SM).

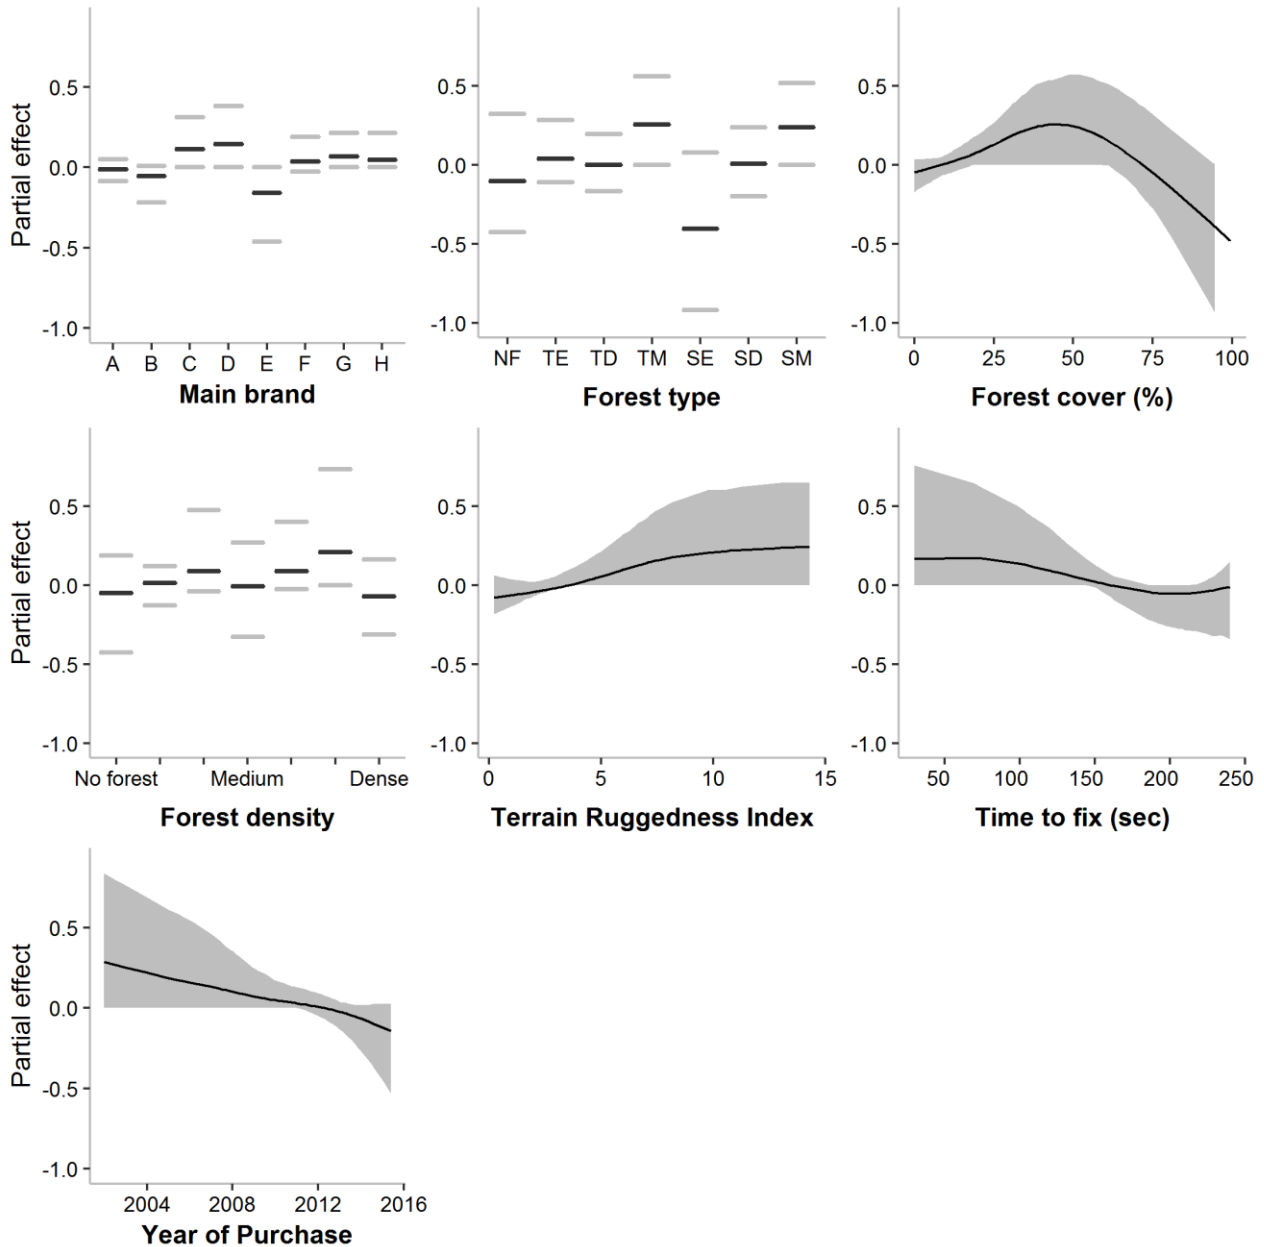

Supplement: pone.0216223.s008.pdf [file pone.0216223.s008.pdf]
