# Supplementary material for: Right on track? Performance of satellite telemetry in terrestrial wildlife research
Source: PubMed Central journal article supplement (PMC6508664; doi:10.1371/journal.pone.0216223), 2019-05-09
Supplement: pone.0216223.s010.pdf [file pone.0216223.s010.pdf]

**S1 Table. Satellite telemetry evaluations.** List of publications evaluating satellite

telemetry, indicating whether success rates or failure rates (as defined in this study) are reported (1) or not (0). \*For publications reporting only on stationary tests, the number of collars used in the study is listed; for publications reporting on animal-borne collars, the number of deployments is listed (if reported). \*\*Fix quality may include measures of fix dimensionality (2D, 3D) and/or accuracy (dilution of precision, horizontal error, etc.).

| Year | # of deployments or collars* | Stationary/animal-borne | Species                          | Region                      | Fix quality** | Fix acquisition rate | Data transfer rate | Overall fix success rate | Deployment failure rate | Technical failure rate | Reference |
|------|------------------------------|-------------------------|----------------------------------|-----------------------------|---------------|----------------------|--------------------|--------------------------|-------------------------|------------------------|-----------|
| 1995 | 6                            | ST/<br>AB               | <i>Alces alces</i>               | Ontario, Canada             | 1             | 1                    | 0                  | 0                        | 0                       | 0                      | (1)       |
| 1996 | 2                            | ST/<br>AB               | <i>Alces alces</i>               | northern Sweden             | 1             | 1                    | 0                  | 0                        | 1                       | 1                      | (2)       |
| 1996 | 1                            | ST/<br>AB               | <i>Alces alces</i>               | Minnesota, USA              | 1             | 1                    | 0                  | 0                        | 0                       | 0                      | (3)       |
| 1997 | ?                            | ST/<br>AB               | <i>Alces alces</i>               | Minnesota, USA              | 1             | 1                    | 0                  | 0                        | 0                       | 0                      | (4)       |
| 2000 | 5                            | AB                      | <i>Odocoileus virginianus</i>    | Mississippi, USA            | 1             | 1                    | 0                  | 0                        | 0                       | 0                      | (5)       |
| 2001 | 10                           | AB                      | <i>Cervus elaphus nelsoni</i>    | New Mexico, USA             | 0             | 1                    | 1                  | 1                        | 1                       | 1                      | (6)       |
| 2001 | 2                            | ST/<br>AB               | <i>Loxodonta africana</i>        | Congo                       | 1             | 1                    | 1                  | 1                        | 1                       | 1                      | (7)       |
| 2002 | 26                           | AB                      | <i>Rangifer tarandus caribou</i> | British Columbia, Canada    | 1             | 1                    | 1                  | 1                        | 1                       | 1                      | (8)       |
| 2002 | 36                           | ST                      | ---                              | British Columbia, Canada    | 1             | 1                    | 0                  | 0                        | 0                       | 0                      | (9)       |
| 2003 | 2                            | ST                      | ---                              | USA                         | 1             | 1                    | 0                  | 0                        | 0                       | 0                      | (10)      |
| 2004 | 81                           | AB                      | <i>Ursus arctos</i>              | western and northern Canada | 1             | 1                    | 1                  | 1                        | 1                       | 1                      | (11)      |
| 2004 | 1                            | AB                      | <i>Macaca fuscata</i>            | Chiba Prefecture, Japan     | 1             | 1                    | 0                  | 0                        | 1                       | 1                      | (12)      |
| 2004 | 7                            | ST/<br>AB               | <i>Cervus elaphus</i>            | Cévennes, France            | 1             | 1                    | 0                  | 0                        | 0                       | 0                      | (13)      |
| 2005 | ?                            | ST                      | ---                              | southwestern Arizona        | 1             | 1                    | 0                  | 0                        | 0                       | 0                      | (14)      |

| Year | # of deployments or collars* | Stationary/animal-borne | Species                                                                                                                                                       | Region                                          | Fix quality** | Fix acquisition rate | Data transfer rate | Overall fix success rate | Deployment failure rate | Technical failure rate | Reference |
|------|------------------------------|-------------------------|---------------------------------------------------------------------------------------------------------------------------------------------------------------|-------------------------------------------------|---------------|----------------------|--------------------|--------------------------|-------------------------|------------------------|-----------|
| 2005 | 5                            | ST                      | ---                                                                                                                                                           | south-east<br>British<br>Columbia,<br>Canada    | 1             | 1                    | 0                  | 0                        | 0                       | 0                      | (15)      |
| 2006 | 14                           | ST/<br>AB               | <i>Ursus arctos</i>                                                                                                                                           | Montana, USA                                    | 1             | 1                    | 0                  | 0                        | 0                       | 0                      | (16)      |
| 2006 | 1                            | ST/<br>AB               | <i>Ursus arctos</i>                                                                                                                                           | southeast<br>Finland                            | 1             | 1                    | 1                  | 1                        | 0                       | 0                      | (17)      |
| 2007 | 6                            | ST/<br>AB               | <i>Canis lupus</i> ,<br><i>Cervus elaphus</i>                                                                                                                 | Alberta, Canada                                 | 0             | 1                    | 1                  | 1                        | 1                       | 1                      | (18)      |
| 2007 | 10                           | ST/<br>AB               | <i>Ursus americanus</i>                                                                                                                                       | Idaho, USA                                      | 1             | 1                    | 0                  | 0                        | 0                       | 0                      | (19)      |
| 2007 | 7                            | ST/<br>AB               | <i>Ursus americanus</i>                                                                                                                                       | Olympic<br>National Park,<br>Washington,<br>USA | 1             | 1                    | 1                  | 1                        | 0                       | 0                      | (20)      |
| 2007 | 1                            | ST/<br>AB               | <i>Canis familiaris</i>                                                                                                                                       | southwest<br>France                             | 1             | 1                    | 0                  | 0                        | 0                       | 0                      | (21)      |
| 2008 | 8                            | ST                      | ---                                                                                                                                                           | Oregon, USA                                     | 1             | 1                    | 0                  | 0                        | 0                       | 0                      | (22)      |
| 2008 | 21                           | ST/<br>AB               | <i>Ursus arctos</i>                                                                                                                                           | British<br>Columbia,<br>Canada                  | 0             | 1                    | 0                  | 0                        | 0                       | 0                      | (23)      |
| 2009 | 5                            | ST                      | ---                                                                                                                                                           | Michigan, USA                                   | 1             | 1                    | 0                  | 0                        | 0                       | 0                      | (24)      |
| 2009 | 15                           | AB                      | <i>Ovis gmelini</i><br><i>musimon x Ovis</i><br><i>sp.</i>                                                                                                    | France                                          | 0             | 1                    | 0                  | 0                        | 1                       | 0                      | (25)      |
| 2009 | 23                           | AB                      | <i>Odocoileus</i><br><i>virginianus</i>                                                                                                                       | Minnesota, USA                                  | 0             | 1                    | 0                  | 0                        | 1                       | 1                      | (26)      |
| 2009 | 39                           | AB                      | <i>Ursus arctos</i> ; <i>U.</i><br><i>americanus</i>                                                                                                          | Wyoming, USA                                    | 0             | 1                    | 1                  | 1                        | 1                       | 1                      | (27)      |
| 2010 | 42                           | ST/<br>AB               | <i>Trichosurus</i><br><i>vulpecula</i> )                                                                                                                      | Waikato, New<br>Zealand                         | 1             | 1                    | 0                  | 0                        | 1                       | 1                      | (28)      |
| 2010 | 9                            | ST/<br>AB               | <i>Trichosurus</i><br><i>vulpecula</i>                                                                                                                        | North Island,<br>New Zealand                    | 1             | 1                    | 0                  | 0                        | 0                       | 0                      | (29)      |
| 2010 | 104                          | AB                      | <i>Canis lupus</i> ,<br><i>Equus hemionus</i> ,<br><i>Equus ferus</i><br><i>przewalski</i> ,<br><i>Procapra</i><br><i>gutturosa</i> ,<br><i>Camelus ferus</i> | Mongolia                                        | 0             | 1                    | 1                  | 1                        | 1                       | 1                      | (30)      |
| 2010 | 48                           | AB                      | <i>Gulo gulo</i> , <i>Lynx</i><br><i>lynx</i>                                                                                                                 | Northen Sweden                                  | 1             | 1                    | 0                  | 0                        | 1                       | 1                      | (31)      |

| Year | # of deployments or collars* | Stationary/animal-borne | Species                                                                                                                                                                                                                                                                              | Region                      | Fix quality** | Fix acquisition rate | Data transfer rate | Overall fix success rate | Deployment failure rate | Technical failure rate | Reference |
|------|------------------------------|-------------------------|--------------------------------------------------------------------------------------------------------------------------------------------------------------------------------------------------------------------------------------------------------------------------------------|-----------------------------|---------------|----------------------|--------------------|--------------------------|-------------------------|------------------------|-----------|
| 2010 | 21                           | AB                      | <i>Cervus nippon</i>                                                                                                                                                                                                                                                                 | Shiranuka Hills, Japan      | 1             | 1                    | 0                  | 0                        | 1                       | 1                      | (32)      |
| 2011 | 43                           | ST/<br>AB               | <i>Felis catus</i>                                                                                                                                                                                                                                                                   | South Island, New Zealand   | 1             | 1                    | 0                  | 0                        | 0                       | 0                      | (33)      |
| 2012 | 1                            | AB                      | <i>Papio hamadryas ursinus</i>                                                                                                                                                                                                                                                       | Western Cape, South Africa  | 1             | 1                    | 0                  | 0                        | 1                       | 1                      | (34)      |
| 2012 | 6                            | ST/<br>AB               | <i>Lutra lutra</i>                                                                                                                                                                                                                                                                   | Southern Portugal           | 1             | 1                    | 1                  | 1                        | 1                       | 1                      | (35)      |
| 2012 | 20                           | ST/<br>AB               | <i>Cervus elaphus</i>                                                                                                                                                                                                                                                                | Germany                     | 1             | 1                    | 0                  | 0                        | 0                       | 0                      | (36)      |
| 2012 | 11                           | ST                      | ---                                                                                                                                                                                                                                                                                  | central New York State, USA | 1             | 1                    | 0                  | 0                        | 0                       | 0                      | (37)      |
| 2013 | 3                            | ST                      | ---                                                                                                                                                                                                                                                                                  | Dunedin, New Zealand        | 1             | 1                    | 0                  | 0                        | 0                       | 0                      | (38)      |
| 2013 | 18                           | ST/<br>AB               | <i>Erinaceus europaeus</i>                                                                                                                                                                                                                                                           | UK                          | 1             | 1                    | 0                  | 0                        | 0                       | 0                      | (39)      |
| 2013 | 4                            | AB                      | <i>Lynx lynx</i>                                                                                                                                                                                                                                                                     | Dinaric alps                | 0             | 1                    | 0                  | 0                        | 0                       | 0                      | (40)      |
| 2013 | 280                          | AB                      | <i>Petrogale lateralis, Canis lupus dingo, Felis catus, Vulpes vulpes, Phascolarctos cinereus, Canis familiaris, Thylogale billardierii, Macropus rufogriseus rufogriseus, Trichosurus cunninghami, Dasyurus maculatus, Dasyurus geoffroii, Macropus giganteus, Vombatus ursinus</i> | Australia                   | 1             | 1                    | 1                  | 1                        | 0                       | 1                      | (41)      |
| 2014 | 39                           | AB                      | <i>Urocyon littoralis</i>                                                                                                                                                                                                                                                            | Northwestern USA            | 1             | 1                    | 1                  | 1                        | 1                       | 1                      | (42)      |
| 2015 | 40                           | ST/<br>AB               | <i>Canis familiaris</i>                                                                                                                                                                                                                                                              | Northeastern France         | 1             | 1                    | 0                  | 0                        | 0                       | 0                      | (43)      |
| 2015 | 59                           | AB                      | <i>Bison bison</i>                                                                                                                                                                                                                                                                   | Yukon, Canada               | 1             | 1                    | 0                  | 0                        | 1                       | 1                      | (44)      |

| Year         | # of deployments or collars* | Stationary/animal-borne | Species                                            | Region                                        | Fix quality** | Fix acquisition rate | Data transfer rate | Overall fix success rate | Deployment failure rate | Technical failure rate | Reference |
|--------------|------------------------------|-------------------------|----------------------------------------------------|-----------------------------------------------|---------------|----------------------|--------------------|--------------------------|-------------------------|------------------------|-----------|
| 2015         | 56                           | ST/<br>AB               | <i>Martes caurina</i>                              | California, USA                               | 1             | 1                    | 0                  | 0                        | 1                       | 1                      | (45)      |
| 2016         | 35                           | AB                      | <i>Felis catus</i>                                 | Australia                                     | 0             | 1                    | 0                  | 0                        | 1                       | 0                      | (46)      |
| 2017         | 23                           | ST/<br>AB               | <i>Coragyps atratus</i> ;<br><i>Cathartes aura</i> | Aiken, South<br>Carolina, USA                 | 1             | 1                    | 0                  | 0                        | 1                       | 1                      | (47)      |
| 2016         | 2                            | AB                      | <i>Tapirus terrestris</i>                          | Middle Caquetá<br>river basin,<br>Colombia    | 1             | 1                    | 1                  | 1                        | 1                       | 1                      | (48)      |
| 2016         | 1                            | AB                      | <i>Tayassu pecari</i>                              | Toledo, Belize                                | 0             | 1                    | 1                  | 1                        | 0                       | 0                      | (49)      |
| 2017         | 30                           | ST/<br>AB               | <i>Brachylagus<br/>idahoensis</i>                  | Lemhi Valley in<br>east-central<br>Idaho, USA | 1             | 1                    | 1                  | 1                        | 1                       | 1                      | (50)      |
| <b>Total</b> | <b>1228</b>                  |                         |                                                    |                                               | <b>40</b>     | <b>50</b>            | <b>15</b>          | <b>15</b>                | <b>23</b>               | <b>22</b>              |           |
| <b>%</b>     |                              |                         |                                                    |                                               | <b>80</b>     | <b>100</b>           | <b>30</b>          | <b>30</b>                | <b>46</b>               | <b>44</b>              |           |

## References

1. Rempel RS, Rodgers AR, Abraham KF. Performance of a GPS Animal Location System under Boreal Forest Canopy. *J Wildl Manage.* 1995;59(3):543–51.
2. Edenius L. Field test of a GPS location system for moose *Alces alces* under Scandinavian boreal conditions. *Wildlife Biol.* 1996;3:39–43.
3. Moen R, Pastor J, Cohen Y, Schwartz CC. Effects of moose movement and habitat use on GPS collar performance. *J Wildl Manage.* 1996;60(3):659–68.
4. Moen R, Pastor J, Cohen Y. Accuracy of GPS telemetry collar locations with differential correction. *J Wildl Manage.* 1997;61(2):530–9.
5. Bowman JL, Kochany CO, Demarais S, Leopold BD. Evaluation of a GPS collar for white-tailed deer. *Wildl Soc Bull.* 2000;28(1):141–5.
6. Biggs JR, Bennett KD, Fresquez PR. Relationship between home range characteristics and

- the probability of obtaining successful global positioning system (GPS) collar positions for elk in New Mexico &quot;Relationship between home range characteristics and the probability of obtaining succe. *West North Am Nat.* 2001;61(2).
7. Blake S, Douglas-Hamilton I, Karesh WB. GPS telemetry of forest elephants in Central Africa: Results of a preliminary study. *Afr J Ecol.* 2001;39(2):178–86.
  8. Johnson CJ, Heard DC, Parker KL. Expectations and realities of GPS animal location collars: results of three years in the field. *Wildlife Biol.* 2002;8:153–9.
  9. D'Eon R, Serrouya R, Smith G, Kochanny CO. GPS ratiotelemetry error and bias in mountainous terrain. *Wildl Soc Bull.* 2002;30(2):430–9.
  10. Di Orio AP, Callas R, Schaefer RJ. Performance of Two GPS telemetry collars under different habitat conditions. *Wildl Soc Bull.* 2003;31(2):372–9.
  11. Gau RJ, Mulders R, Ciarniello LM, Heard DC, Chetkiewicz C-LB, Boyce MS, et al. Uncontrolled field performance of Televilt GPS-Simplex™ collars on grizzly bears in western and northern Canada. *Wildl Soc Bull.* 2004;32(3):693–701.
  12. Sprague DS, Kabaya H, Hagihara K. Field testing a global positioning system (GPS) collar on a Japanese monkey: Reliability of automatic GPS positioning in a Japanese forest. *Primates.* 2004;45(2):151–4.
  13. Janeau G, Adrados C, Joachim J, Gendner J-P, Pépin D. Performance of differential GPS collars in temperate mountain forest. *C R Biol.* 2004;327(12):1143–9.
  14. Cain JW, Krausman PR, Jansen BD, Morgart JR. Influence of topography and GPS fix interval on GPS collar performance. *Wildl Soc Bull.* 2005;33(3):926–34.
  15. D'Eon RG, Delparte D. Effects of radio-collar position and orientation on GPS radio-collar performance, and the implications of PDOP in data screening. *J Appl Ecol.* 2005;42(2):383–8.

16. Graves TA, Waller JS. Understanding the Causes of Missed Global Positioning System Telemetry Fixes. *Wildl Soc Bull.* 2006;70(3):844–51.
17. Sundell J, Kojola I, Hanski I. A New GPS–GSM-Based Method to Study Behavior of Brown Bears. *Wildl Soc Bull.* 2006;34(2):46–450.
18. Hebblewhite M, Percy M, Merrill EH. Are all global positioning system collars created equal? Correcting habitat-induced bias using three brands in the central Canadian Rockies. *J Wildl Manage.* 2007;71(6):2026–33.
19. Lewis JS, Rachlow JL, Garton EO, Vierling LA. Effects of habitat on GPS collar performance: using data screening to reduce location error. *J Appl Ecol.* 2007;44(3):663–71.
20. Sager-Fradkin KA, Jenkins KJ, Hoffman RA, Happe PJ, Beecham JJ, Wright RG. Fix success and accuracy of Global Positioning System collars in old-growth temperate coniferous forests. *J Wildl Manage.* 2007;71(4):1298–308.
21. Cargnelutti B, Coulon A, Hewison AJM, Goulard M, Angibault J-M, Morellet N. Testing Global Positioning System Performance for Wildlife Monitoring Using Mobile Collars and Known Reference Points. *J Wildl Manage.* 2007;71(4):1380–7.
22. Hansen MC, Riggs R a. Accuracy, precision, and observation rates of global positioning system telemetry collars. *J Wildl Manage.* 2008;72(2):518–26.
23. Heard DC, Ciarniello LM, Seip DR. Grizzly bear behavior and global positioning system collar fix rates. *J Wildl Manage.* 2008;72(3):596–602.
24. Belant JL. Effects of Antenna Orientation and Vegetation on Global Positioning System Telemetry Collar Performance. *Northeast Nat.* 2009;16(4):577–84.
25. Bourgoïn G, Garel M, Dubray D, Maillard D, Gaillard J-M. What determines global positioning system fix success when monitoring free-ranging mouflon? *Eur J Wildl Res.*

- 2009;55(6):603–13.
26. Kochanny CO, Delgiudice GD, Fieberg J. Comparing Global Positioning System and Very High Frequency Telemetry Home Ranges of White-Tailed Deer. *J Wildl Manage.* 2009;73(5):779–87.
  27. Schwartz CC, Podruzny S, Cain SL, Cherry S. Performance of Spread Spectrum Global Positioning System Collars on Grizzly and Black Bears. *J Wildl Manage.* 2009;73(7):1174–83.
  28. Blackie HM. Comparative performance of three brands of lightweight Global Positioning System collars. *J Wildl Manage.* 2010;74(8):1911–6.
  29. Dennis TE, Chen WC, Koefoed IM, Lacoursiere CJ, Walker MM, Laube P, et al. Performance Characteristics of Small Global-Positioning-System Tracking Collars for Terrestrial Animal. *Wildl Biol Pract.* 2010;6(1):14–31.
  30. Kaczensky P, Ito TY, Walzer C. Satellite telemetry of large mammals in Mongolia: What expectations should we have for collar function? *Wildl Biol Pract.* 2010;6(2):108–26.
  31. Mattisson J, Andrén H, Persson J, Segerström P. Effects of species behavior on global positioning system collar fix rates. *J Wildl Manage.* 2010;74(3):557–63.
  32. Uno H, Suzuki T, Tachiki Y, Akamatsu R, Hirakawa H. Performance of GPS Collars Deployed on Free-Ranging Sika Deer in Eastern Hokkaido, Japan. *Mammal Study.* 2010;35(2):111–8.
  33. Recio MR, Mathieu R, Denys P, Sirguy P, Seddon PJ. Lightweight GPS-tags, one giant leap for wildlife tracking? An assessment approach. *PLoS One.* 2011;6(12):e28225.
  34. Pebsworth PA, Morgan HR, Huffman MA. Evaluating home range techniques: use of Global Positioning System (GPS) collar data from chacma baboons. *Primates.* 2012;53(4):345–55.

35. Quaglietta L, Martins BH, de Jongh A, Mira A, Boitani L. A Low-Cost GPS GSM/GPRS Telemetry System: Performance in Stationary Field Tests and Preliminary Data on Wild Otters (*Lutra lutra*). Clarke RH, editor. PLoS One. 2012;7(1):e29235. Available from: <http://dx.plos.org/10.1371/journal.pone.0029235>
36. Stache A, Löttker P, Heurich M. Red deer telemetry: Dependency of the position acquisition rate and accuracy of GPS collars on the structure of a temperate forest dominated by European beech and Norway spruce. *Silva Gabreta*. 2012;18(1):35–48.
37. Williams DM, Dechen Quinn A, Porter WF. Impact of Habitat-Specific GPS Positional Error on Detection of Movement Scales by First-Passage Time Analysis. Sueur C, editor. PLoS One. 2012;7(11):e48439.
38. Adams AL, Dickinson KJM, Robertson BC, van Heezik Y. An evaluation of the accuracy and performance of lightweight GPS collars in a suburban environment. PLoS One. 2013;8(7):e68496.
39. Glasby L, Yarnell RW. Evaluation of the performance and accuracy of Global Positioning System bug transmitters deployed on a small mammal. *Eur J Wildl Res*. 2013;59(6):915–9.
40. Krofel M, Skrbinšek T, Kos I. Use of GPS location clusters analysis to study predation, feeding, and maternal behavior of the Eurasian lynx. *Ecol Res*. 2013;28(1):103–16.
41. Matthews A, Ruykys L, Ellis B, Fitzgibbon S, Lunney D, Crowther MS, et al. The success of GPS collar deployments on mammals in Australia. *Aust Mammal*. 2013;35(1):65–83.
42. Cypher B, Drake E, Savage J, King J, Ralls K, Coonan T, et al. Evaluation of New Telemetry Technologies for Research on Island Foxes. *Monogr West North Am Nat* 7,. 2014;7:357–72.
43. Forin-Wiart M-A, Hubert P, Sirguy P, Poulle M. Performance and Accuracy of Lightweight and Low-Cost GPS Data Loggers According to Antenna Positions , Fix



Intervals , Habitats and Animal Movements. PLoS One. 2015;1–21.

44. Jung TS, Kuba K. Performance of GPS collars on free-ranging bison (*Bison bison*) in north-western Canada. Wildl Res. 2015;42:315–23.
45. Moriarty KM, Epps CW. Retained satellite information influences performance of GPS devices in a forested ecosystem. Wildl Soc Bull. 2015;39(2):349–57.
46. McGregor HW, Legge SM, Jones ME, Johnson CN. GPS collars are more efficient when collecting high-frequency data. Aust Mammal. 2016;38(2):237–40.
47. Byrne ME, Holland AE, Bryan AL, Beasley JC. Environmental conditions and animal behavior influence performance of solar-powered GPS-GSM transmitters. Condor. 2017;119(3):389–404.
48. Cabrera JA, Molina E, González T, Armenteras D. Does Plan B work ? Home range estimations from stored on board and transmitted data sets produced by GPS-telemetry in the Colombian Amazon. Int J Trop Biol. 2016;64(4):1441–50.
49. Hofman MPG, Signer J, Hayward MW, Balkenhol N. Spatial ecology of a herd of white-lipped peccaries ( *Tayassu pecari* ) in Belize using GPS telemetry : challenges and preliminary results. Therya. 2016;7(1):21–37.
50. McMahon LA, Rachlow JL, Shipley LA, Forbey JS, Johnson TR, Olsoy PJ. Evaluation of micro-GPS receivers for tracking small-bodied mammals. Crowther MS, editor. PLoS One.;12(3):e0173185.
