# Supplementary material for: Right on track? Performance of satellite telemetry in terrestrial wildlife research
Source: PubMed Central journal article supplement (PMC6508664; doi:10.1371/journal.pone.0216223), 2019-05-09
Supplement: pone.0216223.s011.pdf [file pone.0216223.s011.pdf]

**S2 Table. Tagged individuals per species.** The number and relative proportion of individuals per species across all projects.

| <b>Species</b>                         | <b>Colloquial name</b> | <b>Number</b> | <b>Proportion</b> |
|----------------------------------------|------------------------|---------------|-------------------|
| <i>Alces alces</i>                     | Moose                  | 456           | 15.69%            |
| <i>Rangifer tarandus tarandus</i>      | Reindeer               | 311           | 10.70%            |
| <i>Ovis gmelini musimon x Ovis sp.</i> | Mouflon sheep          | 239           | 8.22%             |
| <i>Acinonyx jubatus</i>                | Cheetah                | 169           | 5.81%             |
| <i>Capreolus capreolus</i>             | Roe deer               | 168           | 5.78%             |
| <i>Rupicapra rupicapra</i>             | Chamois                | 147           | 5.06%             |
| <i>Capra ibex</i>                      | Alpine ibex            | 103           | 3.54%             |
| <i>Lepus europaeus</i>                 | European hare          | 85            | 2.92%             |
| <i>Lynx lynx</i>                       | Eurasian lynx          | 81            | 2.79%             |
| <i>Panthera pardus</i>                 | Leopard                | 71            | 2.44%             |
| <i>Cervus elaphus</i>                  | Red deer               | 70            | 2.41%             |
| <i>Ursus arctos</i>                    | Brown bear             | 64            | 2.20%             |
| <i>Canis lupus dingo</i>               | Dingo                  | 61            | 2.10%             |
| <i>Trichosurus vulpecula</i>           | Brushtail possum       | 58            | 2.00%             |
| <i>Phasianus colchicus</i>             | Ring-Necked Pheasant   | 55            | 1.89%             |
| <i>Ovis aries</i>                      | Sheep                  | 54            | 1.86%             |
| <i>Felis catus</i>                     | Feral cat              | 49            | 1.69%             |
| <i>Brachylagus idahoensis</i>          | Pygmy rabbit           | 46            | 1.58%             |
| <i>Gulo gulo</i>                       | Wolverine              | 43            | 1.48%             |
| <i>Panthera onca</i>                   | Jaguar                 | 43            | 1.48%             |
| <i>Sus scrofa</i>                      | Wild boar              | 42            | 1.44%             |
| <i>Tayassu pecari</i>                  | White-lipped peccary   | 42            | 1.44%             |
| <i>Equus hemionus</i>                  | Asiatic wild ass       | 41            | 1.41%             |
| <i>Vulpes vulpes</i>                   | Red fox                | 32            | 1.10%             |
| <i>Loxodonta africana</i>              | African elephant       | 28            | 0.96%             |
| <i>Panthera uncia</i>                  | Snow leopard           | 25            | 0.86%             |
| <i>Caracal caracal</i>                 | Caracal                | 22            | 0.76%             |
| <i>Papio papio</i>                     | Guinea baboon          | 22            | 0.76%             |
| <i>Felis silvestris silvestris</i>     | European wildcat       | 21            | 0.72%             |
| <i>Phascolarctos cinereus</i>          | Koala                  | 20            | 0.69%             |
| <i>Erinaceus europaeus</i>             | Hedgehog               | 18            | 0.62%             |

| <b>Species</b>                    | <b>Colloquial name</b>   | <b>Number</b> | <b>Proportion</b> |
|-----------------------------------|--------------------------|---------------|-------------------|
| <i>Alligator mississippiensis</i> | American alligator       | 16            | 0.55%             |
| <i>Lepus americanus</i>           | Snowshoe hare            | 16            | 0.55%             |
| <i>Pekania pennanti</i>           | Fisher                   | 16            | 0.55%             |
| <i>Parahyaena brunnea</i>         | Brown hyaena             | 15            | 0.52%             |
| <i>Urocyon littoralis</i>         | Island fox               | 14            | 0.48%             |
| <i>Erethizon dorsatum</i>         | North American porcupine | 12            | 0.41%             |
| <i>Canis mesomelas</i>            | Black-backed jackal      | 10            | 0.34%             |
| <i>Crocuta crocuta</i>            | Spotted hyaena           | 10            | 0.34%             |
| <i>Meles meles</i>                | European badger          | 10            | 0.34%             |
| <i>Puma concolor</i>              | Puma                     | 9             | 0.31%             |
| <i>Ursus americanus</i>           | American black bear      | 9             | 0.31%             |
| <i>Vulpes bengalensis</i>         | Indian fox               | 9             | 0.31%             |
| <i>Myrmecophaga tridactyla</i>    | Giant anteater           | 8             | 0.28%             |
| <i>Procyon lotor</i>              | Racoon                   | 8             | 0.28%             |
| <i>Tragelaphus strepsiceros</i>   | Greater Kudu             | 7             | 0.24%             |
| <i>Connochaetes taurinus</i>      | Common wildebeest        | 6             | 0.21%             |
| <i>Leopardus colocolo</i>         | Pampas cat               | 5             | 0.17%             |
| <i>Leopardus jacobita</i>         | Andean cat               | 5             | 0.17%             |
| <i>Canis lupus familiaris</i>     | Domestic dog             | 4             | 0.14%             |
| <i>Eulemur rufifrons</i>          | Red-fronted lemur        | 4             | 0.14%             |
| <i>Felis chaus</i>                | Jungle cat               | 4             | 0.14%             |
| <i>Geochelone pardalis</i>        | Leopard tortoise         | 4             | 0.14%             |
| <i>Bos javanicus</i>              | Banteng                  | 3             | 0.10%             |
| <i>Pantera leo</i>                | Lion                     | 3             | 0.10%             |
| <i>Papio hamadryas</i>            | Hamadryas baboon         | 3             | 0.10%             |
| <i>Vulpes ferrilata</i>           | Tibetan fox              | 3             | 0.10%             |
| <i>Canis aureus</i>               | Golden jackal            | 2             | 0.07%             |
| <i>Otocolobus manul</i>           | Pallas cat               | 2             | 0.07%             |
| <i>Tapirus terrestris</i>         | South American tapir     | 2             | 0.07%             |
| <i>Panthera tigris</i>            | Tiger                    | 1             | 0.03%             |
| <i>Tapirus bairdii</i>            | Central American tapir   | 1             | 0.03%             |
